# Supplementary material for: Direct Measurements of Ozone Response to Emissions Perturbations in California
Source: Copernicus journal article supplement (doi:10.5194/acp-2021-708), 2021-09-20
Supplement: Supplementary file 1 [file acp-2021-708-supplement.pdf]

## Direct Measurements of Ozone Response to Emissions Perturbations in California

- 5 Shenglun Wu<sup>1</sup>, Hyung Joo Lee<sup>2</sup>, Andrea Rohrbacher<sup>3</sup>, Shang Liu<sup>2</sup>, Toshihiro Kuwayama<sup>2</sup>, John H. Seinfeld<sup>4</sup>, and Michael J. Kleeman<sup>1</sup>

<sup>1</sup>Department of Civil and Environmental Engineering, University of California Davis, 1 Shields Ave, Davis, CA 95616, USA

<sup>2</sup>Department of Chemistry, University of California Irvine, Irvine, CA 92697, USA

<sup>3</sup>Research Division, California Air Resources Board, 1001 I Street, Sacramento, CA 95814, USA

- 10 <sup>4</sup>Department of Chemical Engineering, California Institute of Technology, 1200 E. California Blvd, Pasadena, CA 91125, USA

Correspondence to: Michael J. Kleeman (mjkleeman@ucdavis.edu)

### 1. Configuration of transportable smog chamber system.

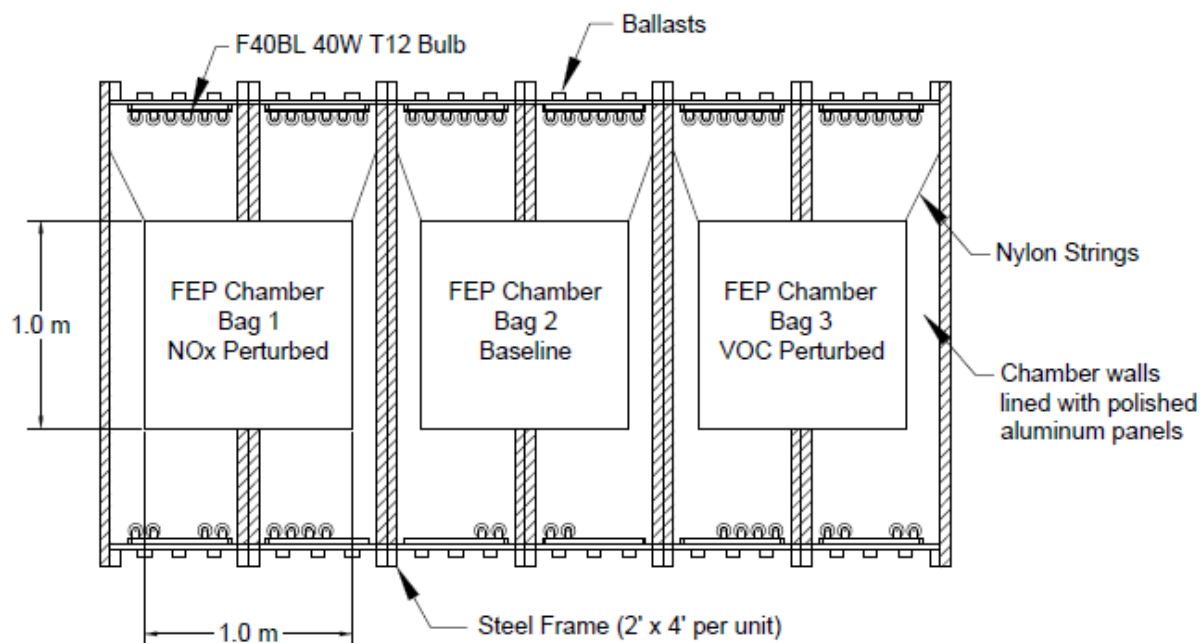

Figure S1. cross-sectional view of the transportable smog chamber system

2. Consistency of O<sub>3</sub> formation in smog chambers

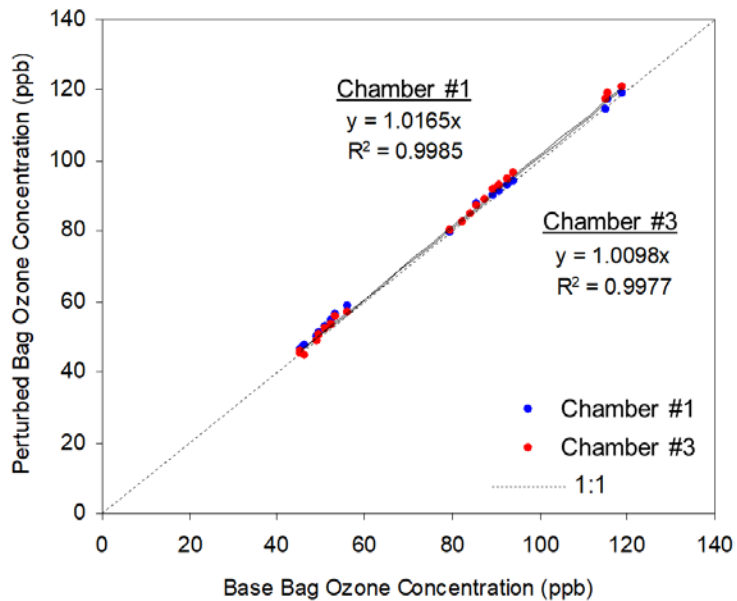

20    **Figure S2. Consistency check of three 1 m<sup>3</sup> FEP bags using equal NO<sub>x</sub>-VOC mixture.**

25

30

35

3. Ambient and chamber O<sub>3</sub> formation comparison

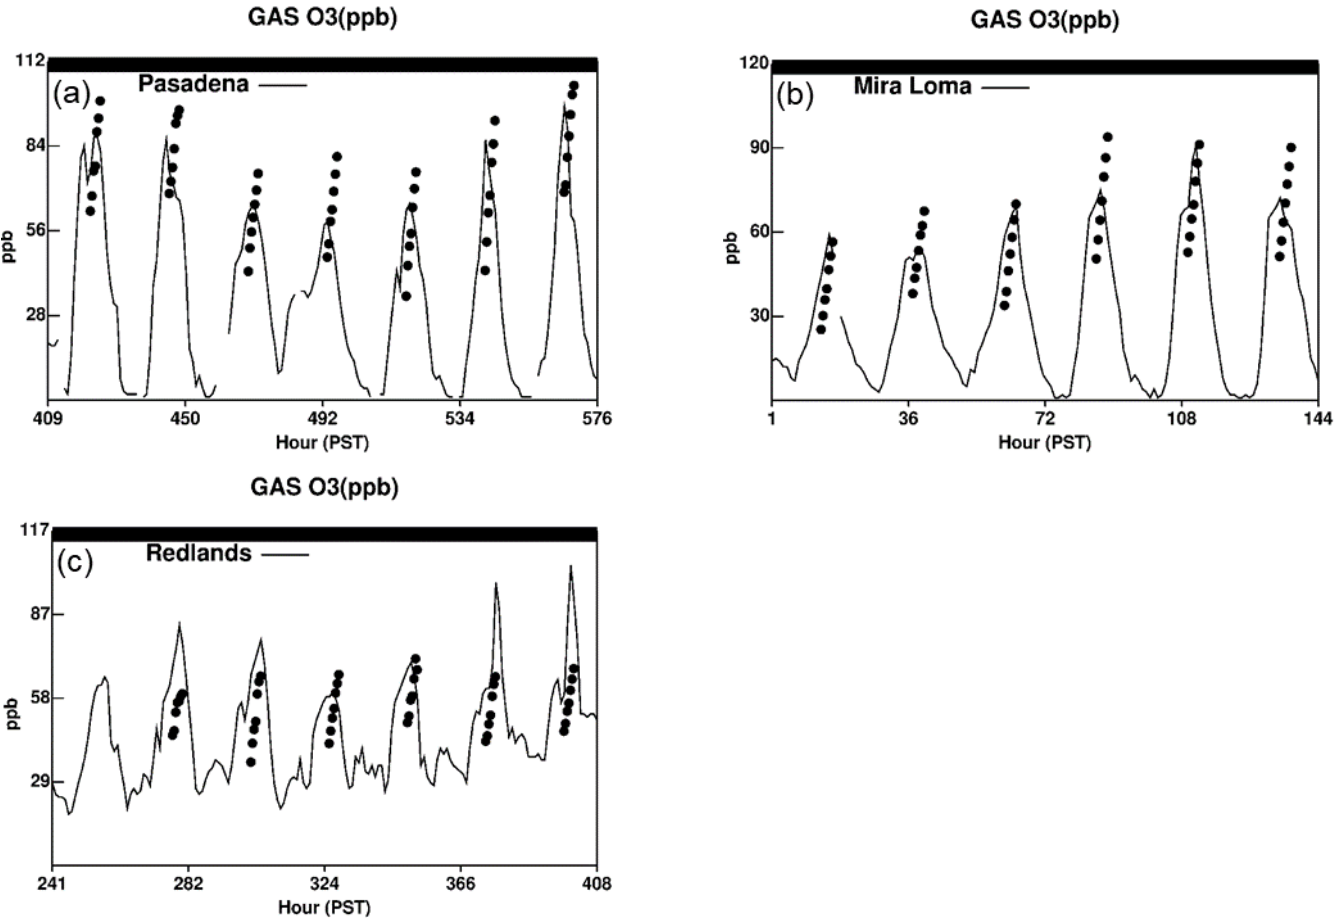

Figure S3. Ambient (solid line) vs. Chamber (solid circles) O<sub>3</sub> concentrations measured at Pasadena (a), Mira Loma (b), and Redlands (c). Chambers were filled over a ~2hr period followed by a 30 min measurement period before UV lights were turned on. Hour is relative to the start of the experiment.

#### 4. CO\*Biogenic calculation

Temperature and relative humidity-induced enhancement factor for isoprene emissions

$$T = \frac{\exp[T_1(T_L - T_s)/RT_L T_s]}{1 + \exp[T_1(T_L - T_3)/RT_L T_s]}$$

Where  $T_L$  is the ambient temperature (kelvins),  $T_s$  is the normalizing temperature (301 k), R is the gas constant (8.314  $J K^{-1} mol^{-1}$ ), and  $T_1$  (= 95100  $J mol^{-1}$ ),  $T_2$  (= 231000  $J mol^{-1}$ ),  $T_3$  (= 311.83 k) are empirical coefficient.

$$H = RH \cdot H_1 + H_2$$

Where RH is relative humidity (%) and  $H_1$  (=0.00236) and  $H_2$  (=0.8495) are empirical coefficients.

$$CO * Biogenic = [CO] \times T \times H$$

Where [CO] is CO concentration (ppb) measured in the nearby monitoring station.

#### 5. VOC reactivity (VOCR) and CO\*Biogenic correlation

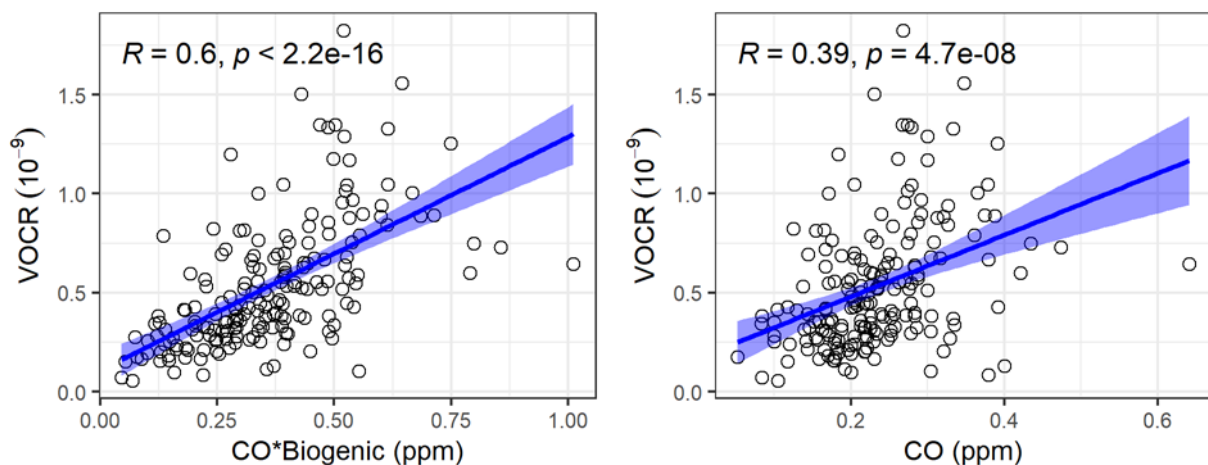

Figure S4. Scatter plot of VOC reactivity vs CO concentration (right) and CO\*Biogenic (left) in Sacramento during the years 2010-2019.



### 7. Chamber and satellite O<sub>3</sub> sensitivity correlation

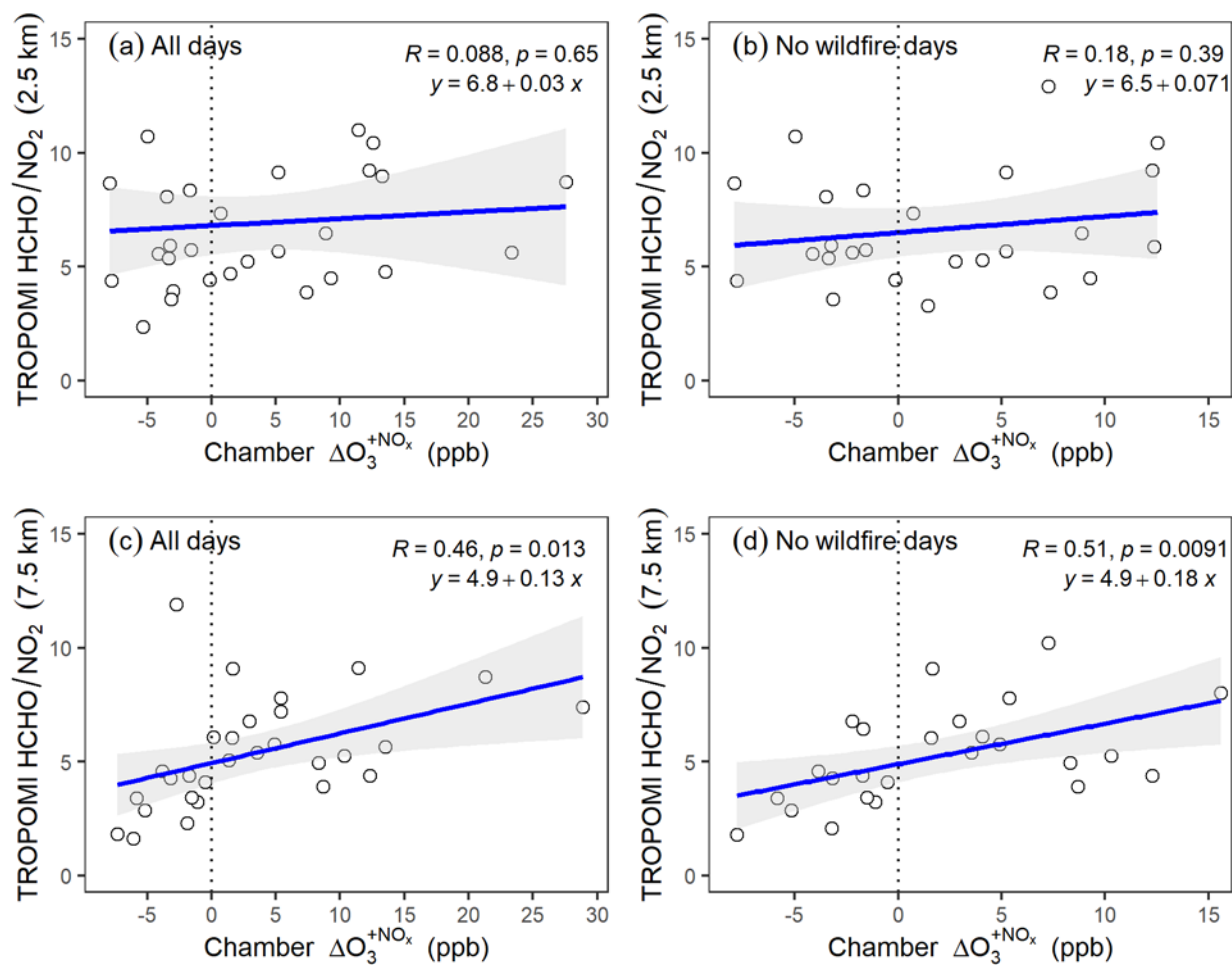

**Figure S6. Correlation between weekly averaged TROPOMI satellite HCHO/NO<sub>2</sub> at other two circular buffers (2.5 km (top) and 7.5 km (bottom)) and the weekly averaged chamber  $\Delta O_3^{+NO_x}$  from ground-based measurement.**

## 8. Monthly variance of TROPOMI HCHO/NO2 in California

**Table S1. Monthly averaged TROPOMI satellite HCHO/NO2 for all air basins in California**

| Air Basin                         | N    | Feb          | Mar          | Apr          | May          | June          | July          | Aug           | Sept          | Oct          |
|-----------------------------------|------|--------------|--------------|--------------|--------------|---------------|---------------|---------------|---------------|--------------|
| Northeast Plateau                 | 1701 | 4.7<br>(1.9) | 3.5<br>(1.3) | 3.4<br>(1.2) | 5.7<br>(1.2) | 9.8 (1.5)     | 12.4<br>(2.4) | 10.9<br>(2.2) | 11.0<br>(1.7) | 6.8<br>(0.9) |
| North Coast                       | 1349 | 5.0<br>(1.6) | 4.1<br>(1.1) | 4.1<br>(1.5) | 5.2<br>(1.1) | 9.2 (1.7)     | 12.6<br>(2.8) | 11.5<br>(2.2) | 9.4 (2.7)     | 6.5<br>(1.1) |
| Sacramento Mountain Counties      | 1643 | 3.9<br>(1.6) | 3.2<br>(1.1) | 3.4<br>(1.1) | 4.7<br>(1.2) | 8.8 (2.0)     | 11.3<br>(3.3) | 10.7<br>(2.2) | 10.7<br>(2.2) | 5.9<br>(1.5) |
| Lake County                       | 144  | 3.6<br>(1.4) | 3.5<br>(1.4) | 3.3<br>(1.3) | 4.5<br>(0.9) | 10.2 (1.7)    | 11.9<br>(2.3) | 10.3<br>(2.3) | 10.3<br>(2.4) | 5.9<br>(1.7) |
| Lake Tahoe Great Basin Valleys    | 40   | 4.5<br>(1.1) | 4.0<br>(1.2) | 4.5<br>(1.1) | 5.0<br>(1.0) | 10.2 (0.8)    | 12.1<br>(1.4) | 10.3<br>(2.0) | 10.3<br>(2.2) | 5.9<br>(0.7) |
| San Francisco Bay                 | 583  | 2.4<br>(0.9) | 2.8<br>(1.7) | 2.6<br>(1.1) | 3.5<br>(1.0) | 11.2<br>(1.3) | 11.2<br>(1.3) | 11.7<br>(0.9) | 11.7<br>(0.9) | 6.2<br>(0.7) |
| San Joaquin Valley                | 2473 | 3.4<br>(1.2) | 2.7<br>(1.2) | 3.3<br>(1.4) | 5.0<br>(1.0) | 10.2 (1.7)    | 10.6<br>(2.6) | 8.9 (1.9)     | 8.9 (2.2)     | 7.7<br>(1.7) |
| North Central Coast               | 542  | 1.8<br>(0.9) | 2.4<br>(0.8) | 2.6<br>(0.9) | 3.6<br>(0.8) | 6.2 (1.5)     | 6.5 (1.6)     | 6.0 (1.5)     | 7.4 (1.6)     | 3.8<br>(1.1) |
| Mojave Desert South Central Coast | 791  | 2.6<br>(1.4) | 2.6<br>(1.3) | 3.3<br>(1.4) | 4.3<br>(1.2) | 8.2 (3.4)     | 8.7 (3.4)     | 7.5 (2.1)     | 7.7 (1.6)     | 6.4<br>(2.2) |
| South Coast                       | 689  | 2.8<br>(0.7) | 2.9<br>(1.0) | 3.7<br>(1.0) | 4.9<br>(0.8) | 7.4 (1.1)     | 8.4 (1.2)     | 7.4 (1.1)     | 8.2 (1.2)     | 5.6<br>(1.2) |
| Salton Sea San Diego County       | 429  | 2.6<br>(0.6) | 2.6<br>(0.7) | 3.7<br>(0.9) | 4.5<br>(0.7) | 7.8 (1.2)     | 7.7 (1.3)     | 6.8 (1.2)     | 7.2 (1.2)     | 5.3<br>(1.0) |
|                                   |      | 2.7<br>(0.7) | 2.6<br>(0.9) | 3.9<br>(0.9) | 5.2<br>(0.7) | 8.8 (1.2)     | 9.4 (1.4)     | 8.5 (1.1)     | 9.6 (1.3)     | 6.7<br>(1.2) |
|                                   |      | 1.1<br>(0.6) | 1.5<br>(0.7) | 2.5<br>(0.8) | 3.4<br>(1.1) | 5.1 (1.9)     | 5.1 (2.1)     | 4.5 (1.6)     | 4.2 (1.9)     | 3.0<br>(1.5) |
|                                   |      | 2.5<br>(0.6) | 3.1<br>(0.6) | 3.9<br>(0.6) | 4.8<br>(0.6) | 7.2 (1.0)     | 7.7 (1.2)     | 7.1 (1.2)     | 6.5 (1.1)     | 4.8<br>(0.9) |
|                                   |      | 2.1<br>(0.9) | 2.4<br>(0.8) | 3.3<br>(0.8) | 4.5<br>(0.9) | 7.4 (1.6)     | 7.5 (1.9)     | 7.4 (1.6)     | 6.9 (1.7)     | 4.8<br>(1.5) |

95 Note: Mean (SD) of TROPOMI (HCHO/NO<sub>2</sub>) shown.
